# Supplementary material
Source: Springer Nature journal article supplement (https://www.springerprofessional.de/resource/supplementary/13638_2014_974_MOESM4_ESM.pdf/11898900)

virtual flow list

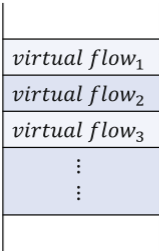

|                 |               |
|-----------------|---------------|
| Source          | Destination   |
| Coding Flag     | Coding Expire |
| Forwarding List |               |
| Expire          |               |

Supplement: MOESM4 [file 11898900]
